# Supplementary material
Source: PubMed Central journal article supplement (PMC7450246)

# Supplementary Figure 1. Representative D1-D2 PLA images in the striatum and cortex

## A. Striatum

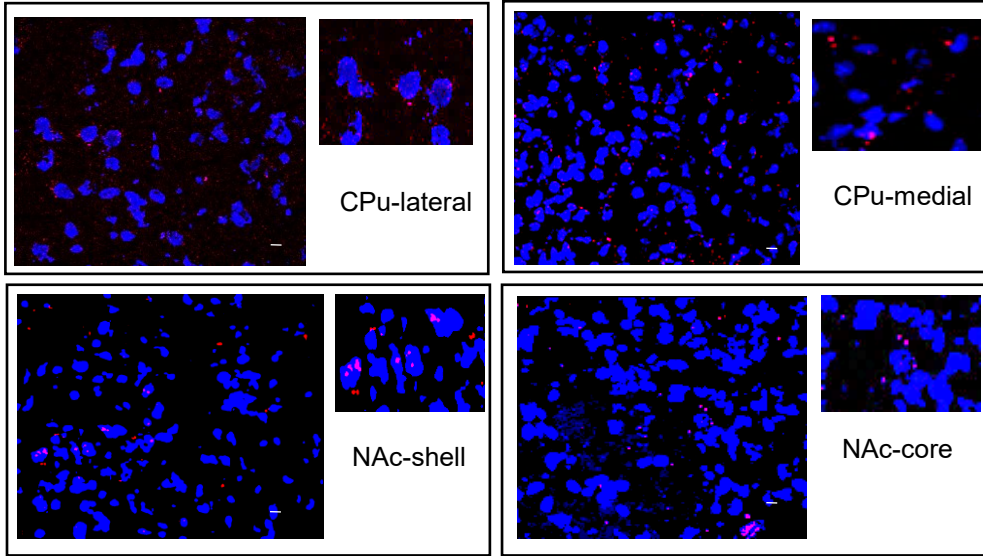

## B. Cortex

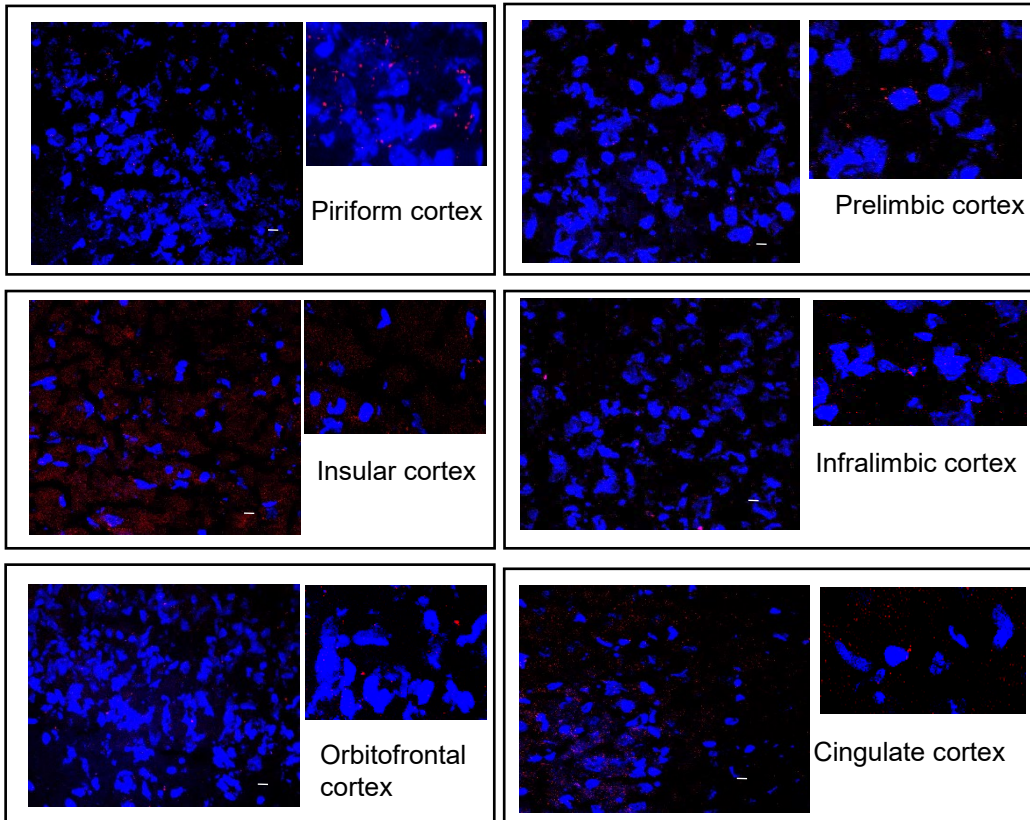

# Supplementary Figure 2. Representative D1-D2 PLA images from different rat brain regions

## A. Hippocampus and Amygdala

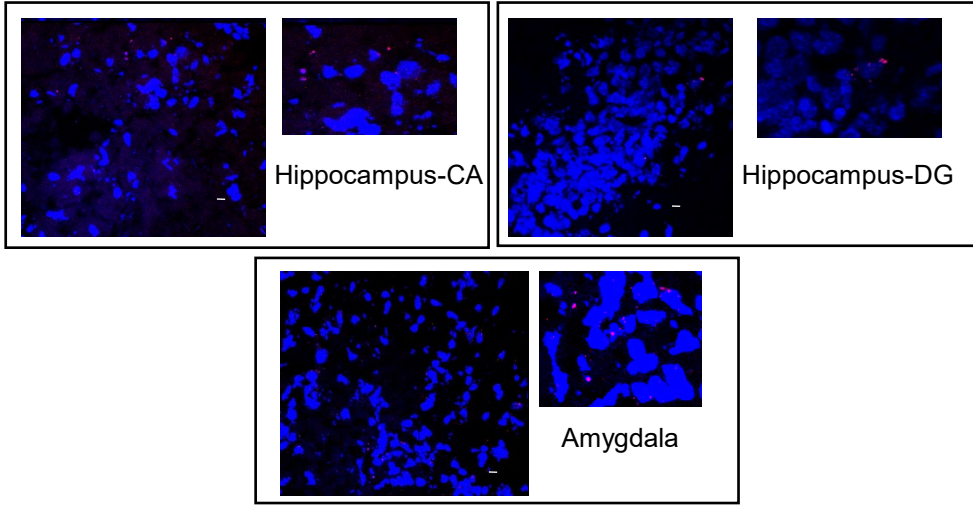

## B. Substantia nigra, Ventral tegmental area and Locus coeruleus

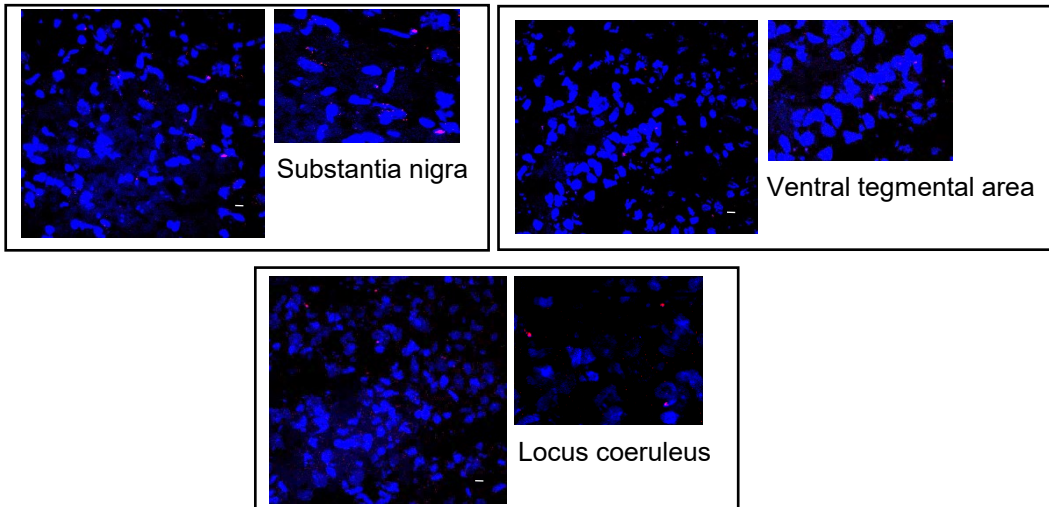

## C. Olfactory Tubercle, Lateral habenula and Claustrum

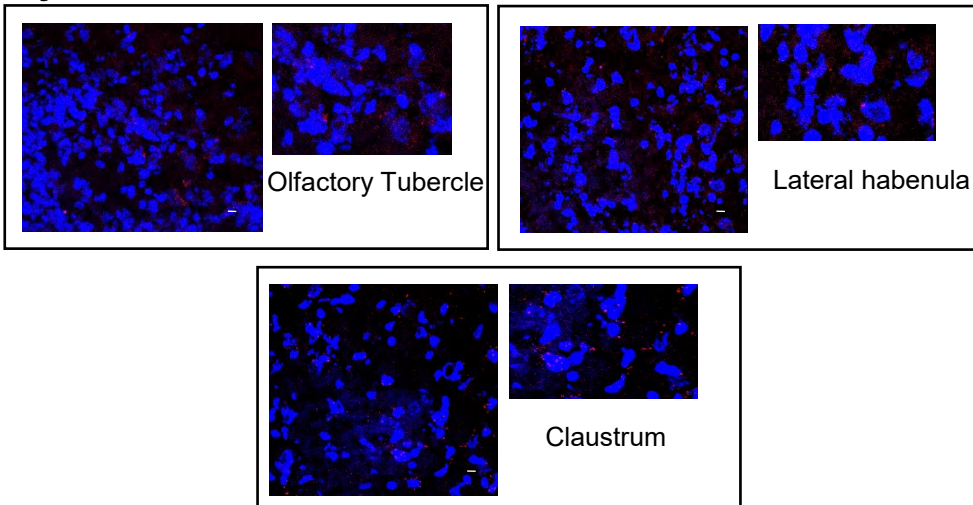

**Supplementary Figure 3.** Co-Immunoprecipitation of D1R by D2R from different brain regions of male rats

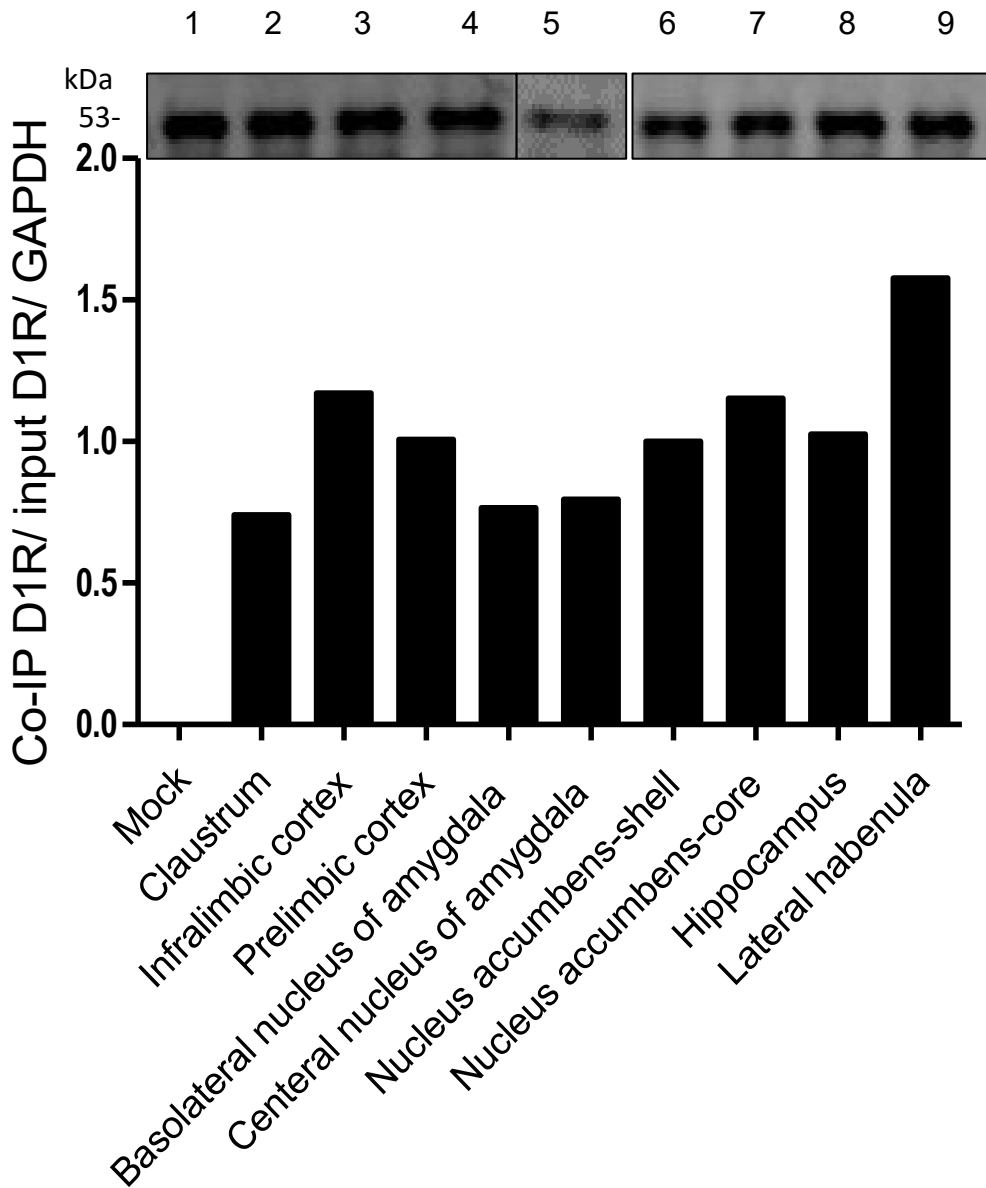

# Supplementary Figure 4. Effect of cocaine treatment on D1-D2 heteromer

## A. D1-D2 heteromer estimation by PLA in caudal striatum

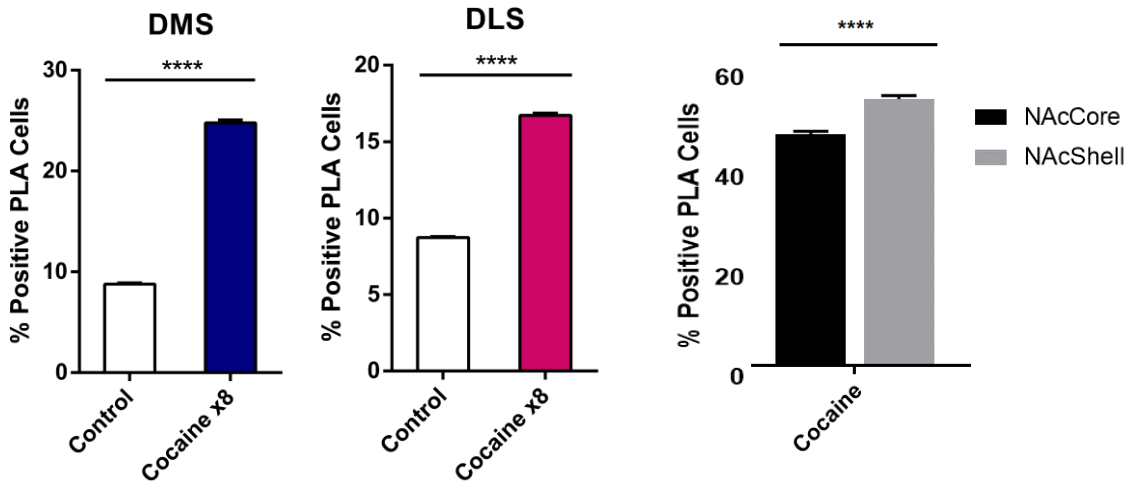

## B. Rostro-caudal gradient of D1-D2 heteromer in the striatum

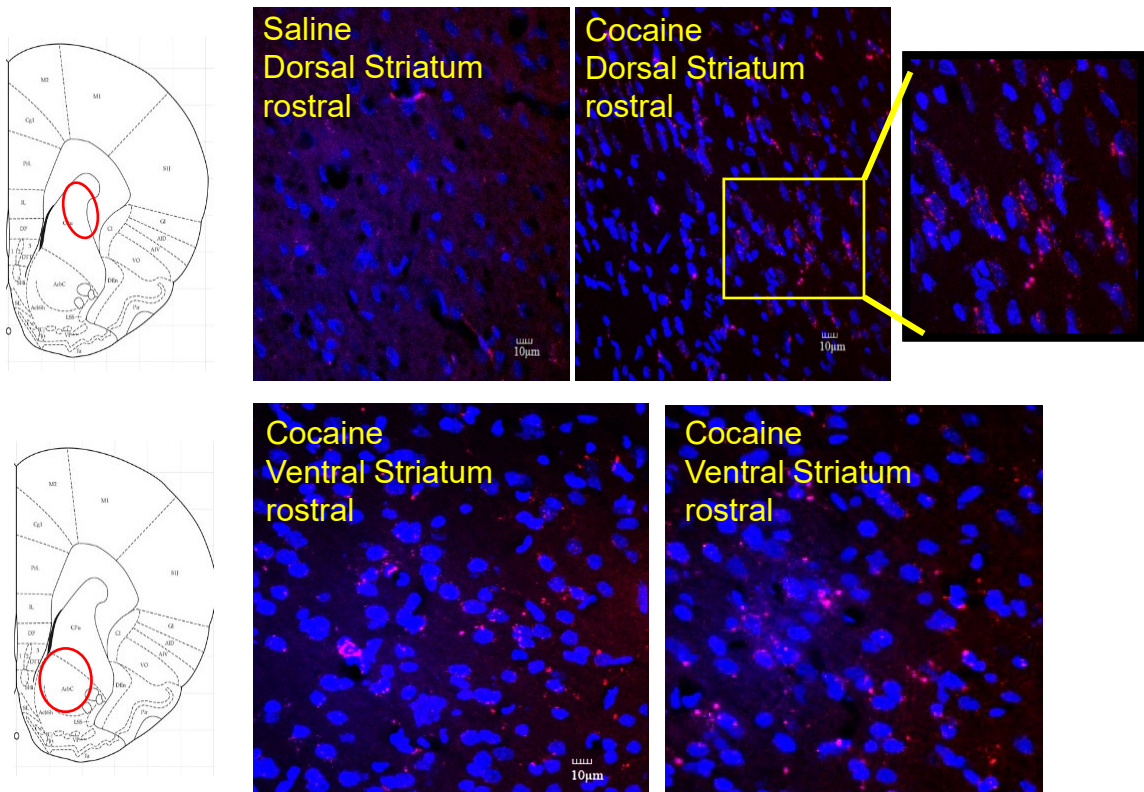

# Supplementary Figure 5. FISH analysis of D1 and D2 mRNA expression

## A. Relative distribution of D1 and D2 mRNA-positive cells in vehicle-treated rats

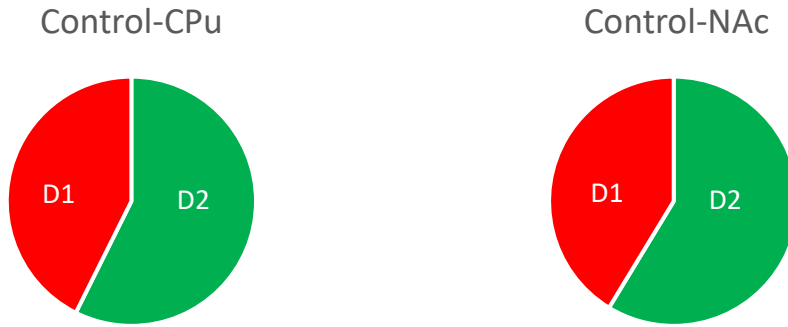

## B. Relative distribution of D1 and D2 mRNA-positive cells in cocaine-treated rats

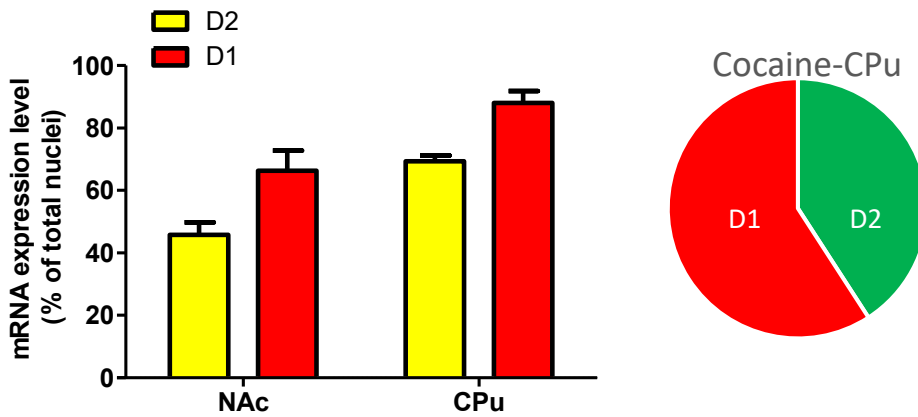

## C. Changes in D1 and D2 mRNA expression in cocaine-treated rats

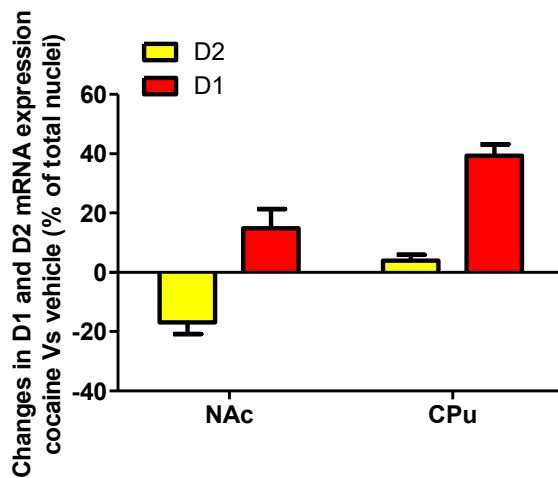

Supplement: NIHMS1615318-supplement-1.pdf [file NIHMS1615318-supplement-1.pdf]
